# Supplementary material for: Iron fluorophosphates
Source: Royal Society of Chemistry journal article supplement (doi:10.1039/c3dt50324k), 2013-01-01
Supplement: c3dt50324k.pdf [file c3dt50324k.pdf]

## Electronic Supplementary Information

Iron Fluorophosphates:  
Powder X-ray diffraction data for Compounds I and III

Adam C. Keates,<sup>b</sup> Jennifer A. Armstrong<sup>b</sup> and Mark T. Weller<sup>\*a</sup>

<sup>a</sup> Department of Chemistry, University of Bath, Bath BA2 7AY

<sup>b</sup> School of Chemistry, University of Southampton, Highfield Campus, Southampton,  
Hampshire, SO17 1BJ, UK.

\*To whom to correspond should be addressed:

E-mail [m.t.weller@bath.ac.uk](mailto:m.t.weller@bath.ac.uk). Tel: +44 (0) 1225 386531

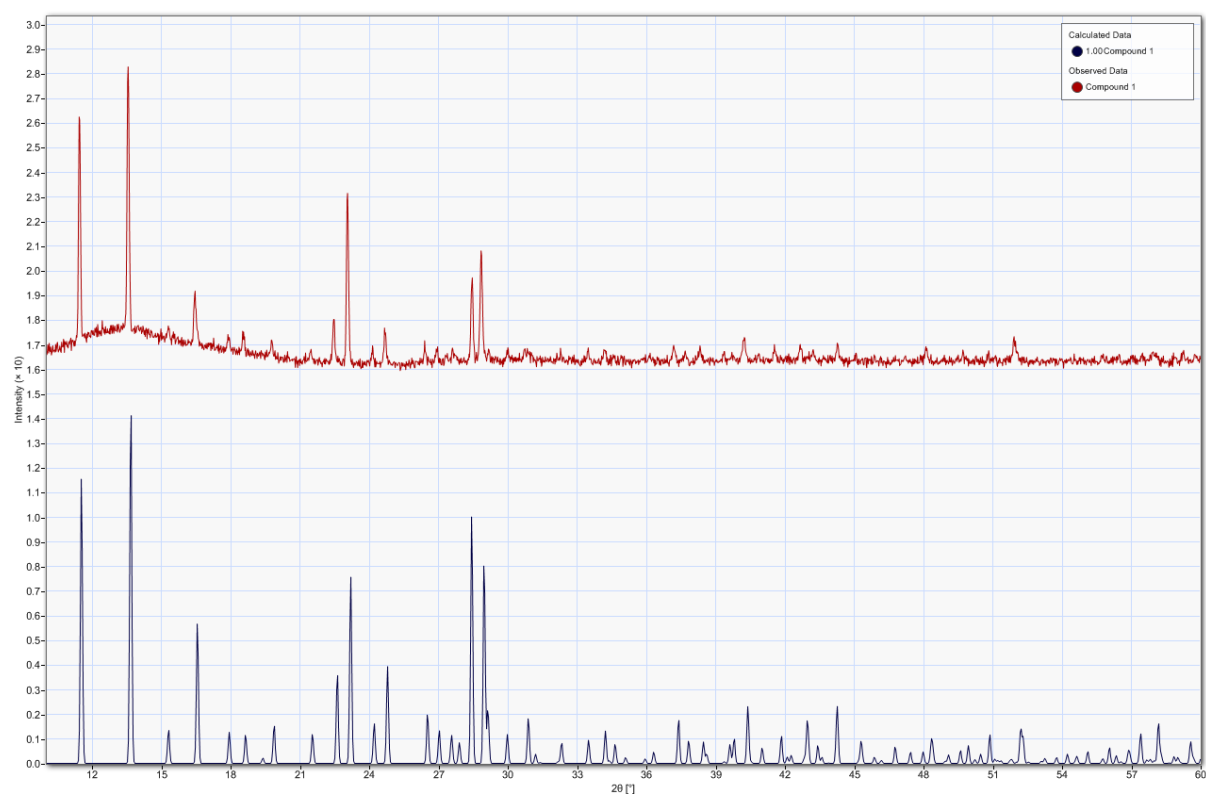

**Figure S1.** Calculated (blue) and experimental (red) PXD pattern for compound **I**

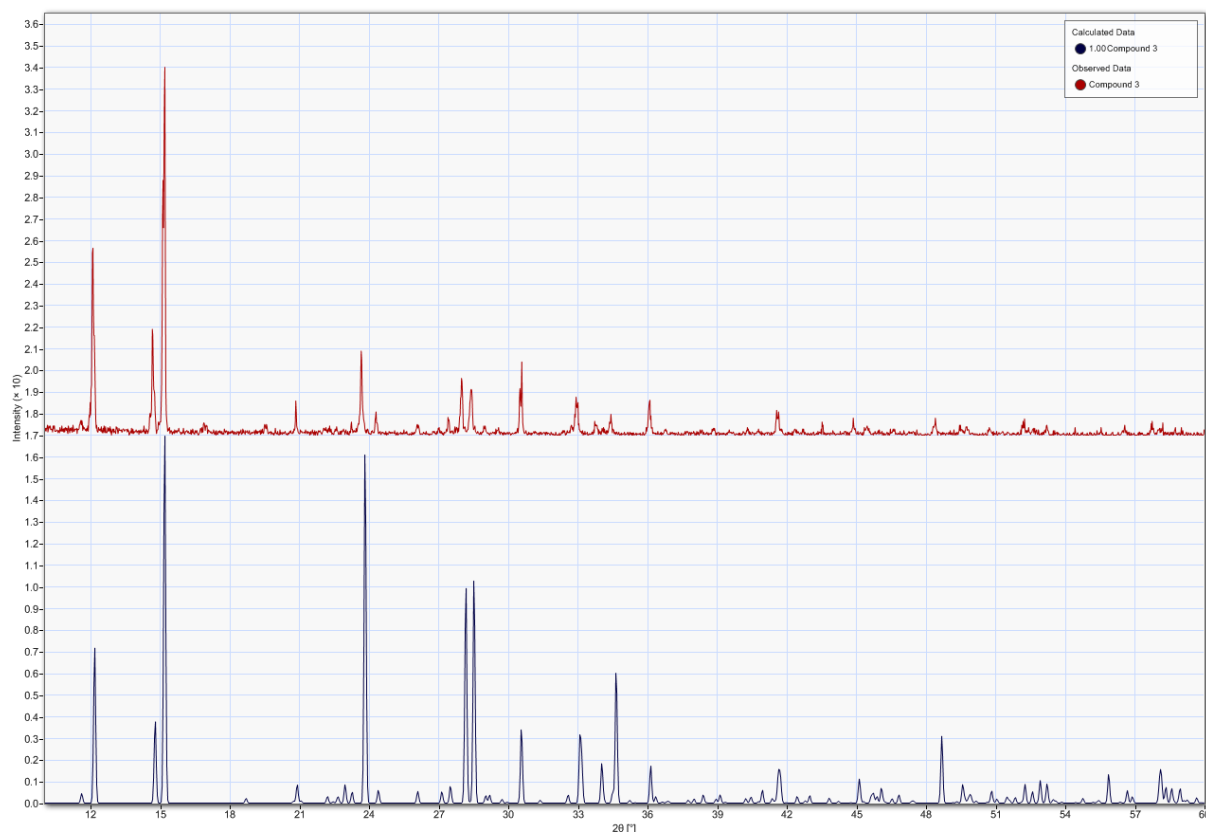

**Figure S2.** Calculated (blue) and experimental (red) PXD pattern for compound **III**
